# Supplementary material for: Risk for Depression and Anxiety in Youth: The Interaction between Negative Affectivity, Effortful Control, and Stressors
Source: Springer Nature journal article supplement (doi:10.1007/s10802-015-9997-7), 2015-04-13
Supplement: MOESM4 [file 543130]

Figure 2: NA x EC interaction predicting residual changes in anxious symptoms at T2 at low and high levels of independent stress

*MASC* Multidimensional Anxiety Scale for Children; *NA* Negative Affectivity from the Positive and Negative Affect Schedule-Child Version; *EC* Effortful Control from the Early Adolescent Temperament Questionnaire; *INDEPENDENT* *STRESS*; Number of Independent Stressors endorsed on the Adolescent Life Events Questionnaire
